# Supplementary material for: Personalized analysis of minimal residual cancer cells in peritoneal lavage fluid predicts peritoneal dissemination of gastric cancer
Source: PubMed Central journal article supplement (PMC8507390; doi:10.1186/s13045-021-01175-2), 2021-10-12

## **Supplementary Figures**

**Fig. S1. Patient enrollment, sample collection workflow and the prognosis prediction of patients**

**Fig. S2. Kaplan–Meier estimates of recurrence-free survival (RFS) based on clinical risk factors and MRD analysis**

Fig. S1. Patient enrollment, sample collection workflow and the prognosis prediction of patients.

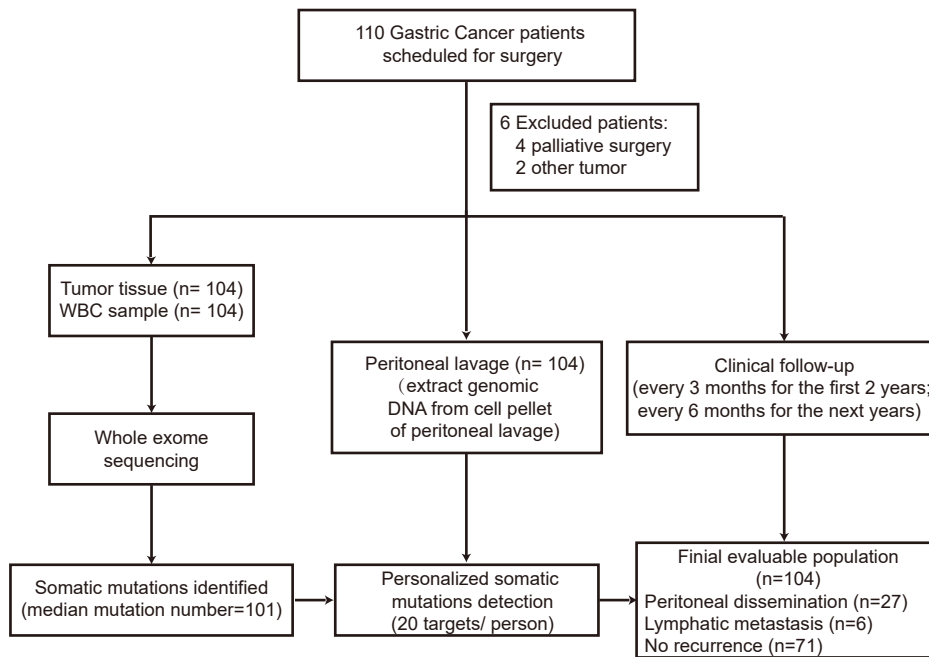

Figure S2. Kaplan–Meier estimates of recurrence-free survival (RFS) based on clinical risk factors and MRD analysis.

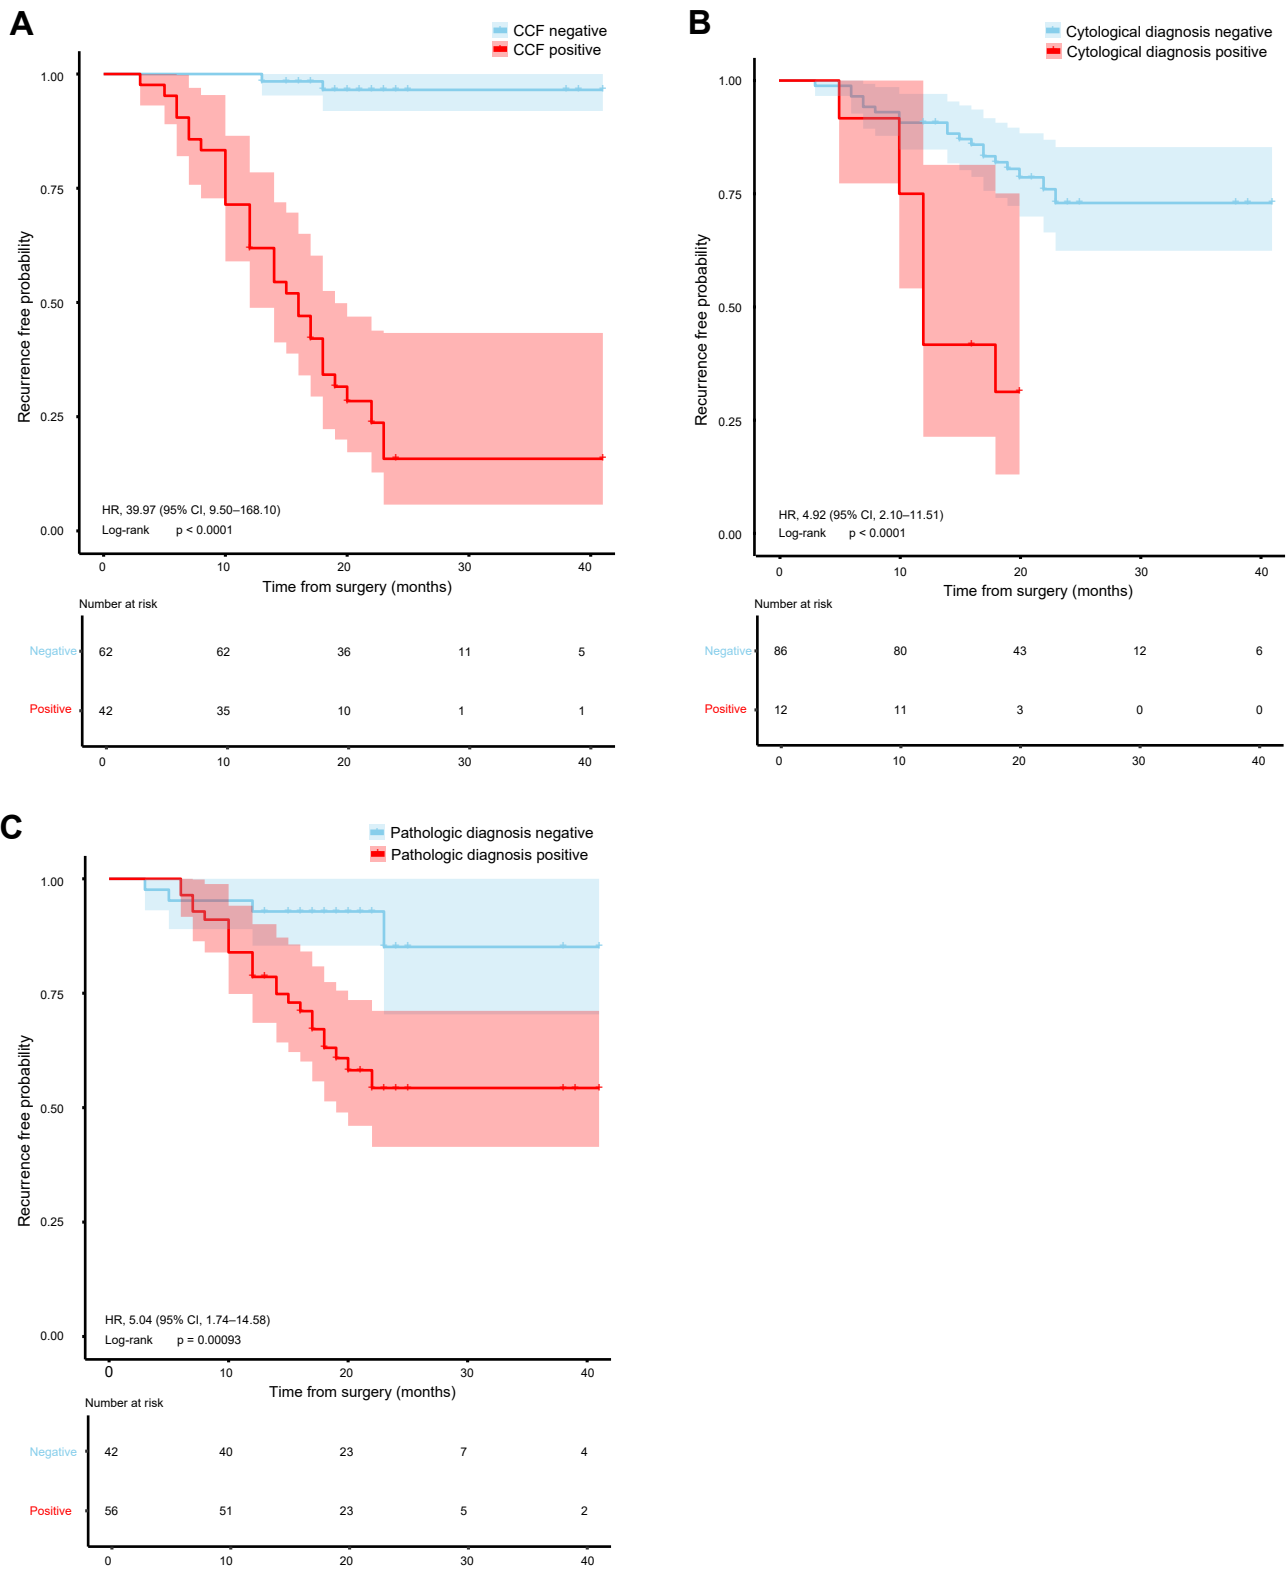

Supplement: 13045_2021_1175_MOESM3_ESM.pdf [file 13045_2021_1175_MOESM3_ESM.pdf]
